# Supplementary material for: Galectin-3 as a Novel Multifaceted and Not Only Cardiovascular Biomarker in Patients with Psoriasis with Regard to Systemic Treatment—Preliminary Data
Source: MDPI journal article supplement (doi:10.3390/biology11010088), 2022-01-07
Supplement: s1 [file s1]

**Table S1. Selected characteristic of the study subgroups depending on the drug.**

Parameters with "1" mean the value before treatment and with "2" – after treatment.

| Parameter             | Acitretin ( <i>n</i> = 13) | Methotrexate ( <i>n</i> = 18) |
|-----------------------|----------------------------|-------------------------------|
| PASI 1                | 20.3±7.54                  | 14.6±7.05 *                   |
| PASI 2                | 6.42±3.65 ^^^              | 3.14±1.54 ** ^^               |
| Years                 | 19 (2 – 58)                | 11 (1-63)                     |
| Current time (months) | 2 (1 – 24)                 | 3 (1 – 24)                    |
| Age                   | 50.7±18.5                  | 57.6±14.1                     |
| Body Weight [kg]      | 85.1±19.5                  | 86.1±23.2                     |
| Height [cm]           | 178±5.74                   | 167.1±11.2**                  |
| BMI                   | 27±6.01                    | 30.4±6.69                     |
| Cigarette smoking     | 8/5                        | 7/11                          |
| HGB 1                 | 13.3±1.86                  | 13.7±1.22                     |
| HGB 2                 | 13.3±1.99                  | 13.1±1.18                     |
| RBC 1                 | 4.31±0.71                  | 4.41±0.32                     |
| RBC 2                 | 4.42±0.68                  | 4.15±0.31 ^                   |
| WBC 1                 | 7.09±1.11                  | 8.07±2.11                     |
| WBC 2                 | 6.56±1.25                  | 6.67±1.74 ^                   |
| PLT 1                 | 249±91.8                   | 260±57.5                      |
| PLT 2                 | 221±58.3                   | 240±58.6                      |
| GLU 1                 | 78 (53 – 125)              | 92 (53 – 215) *               |
| GLU 2                 | 87 (55 – 110)              | 90 (65 – 140)                 |
| CRP 1                 | 6.35 (1 – 29.6)            | 3.55 (1 – 34.7)               |
| CRP 2                 | 1.87 (1 – 15) ^            | 1.94 (0.5 – 5.8) ^            |
| ALT 1                 | 19 (10 – 48)               | 27 (12 – 46)                  |
| ALT 2                 | 16 (9 – 42)                | 23 (12 – 49)                  |
| AST 1                 | 21 (14 – 86)               | 21 (15 – 47)                  |
| AST 2                 | 16 (12 – 39)               | 20 (13 – 52)                  |
| CHOL 1                | 154±36.8                   | 185±35.1 *                    |
| CHOL 2                | 174±47.2                   | 168±30.9                      |
| TG 1                  | 122±51.1                   | 143±62.8                      |
| TG 2                  | 112±48.5                   | 126±46.1                      |

\*/\*\*/\*\*\* - means the existence of statistically significant difference between ACY vs MTX subgroup

^/^^/^^^ - means statistical differences in each parameter before and after treatment

**Table S2. Selected characteristic of the study subgroups depending on PASI.**

Parameters with “1” mean the value before treatment and with “2” – after treatment.

| Parameter               | PASI I (n = 8)         | PASI II (n = 12)           | PASI III (n = 11)                |
|-------------------------|------------------------|----------------------------|----------------------------------|
| Family history          | 3/5                    | 6/6                        | 7/4                              |
| Sun's impact            | 6/2                    | 6/6                        | 4/7                              |
| PASI 1                  | <b>8.75±1.92</b>       | <b>14.3±2.67 ***</b>       | <b>26.1±4.24 *** ###</b>         |
| PASI 2                  | <b>2.95±1.9 ^^^</b>    | <b>4.01±2.88 * ^^^</b>     | <b>6.48±3.67 * # ^^^</b>         |
| Psoriasis history [yrs] | 24.5 (2 – 52)          | <b>8 (1 – 63) *</b>        | 24 (6 – 58)                      |
| Current time [months]   | 2.5 (1 – 10)           | 3 (1 – 24)                 | 2.1 (1 – 20)                     |
| City/village            | 3/5                    | 2/10                       | 6/5                              |
| Age [yrs]               | 55.9±5.33              | 51.1±21.1                  | 56.2±15.9                        |
| Body Weight [kg]        | <b>87.1±19.8</b>       | <b>47.8±12 *</b>           | <b>95.9±25 * ##</b>              |
| Height [cm]             | 170±10.3               | 170±11.9                   | 175±7.58                         |
| BMI                     | <b>30.1±6.1</b>        | <b>25.9±4.14 *</b>         | <b>31.3±7.86 #</b>               |
| Cigarette smoking       | 4/4                    | 6/6                        | 4/7                              |
| HGB 1                   | 14.4±1.34              | 13.8±1.53                  | 12.95±1.92                       |
| HGB 2                   | 13.5±0.92              | 13.4±1.99                  | 12.8±1.08                        |
| RBC 1                   | 4.61±0.48              | 4.35±0.63                  | 4.29±0.54                        |
| RBC 2                   | 4.33±0.32              | 4.28±0.65                  | 4.31±0.38                        |
| WBC 1                   | 7.62±2.24              | 7.55±1.91                  | 7.68±1.7                         |
| WBC 2                   | 6.64±1.65              | 6.48±1.38                  | 7.05±1.83                        |
| PLT 1                   | 230±41.6               | 259±71.4                   | 260±98.8                         |
| PLT 2                   | 226±59.7               | 241±65.7                   | 224±62.1                         |
| GLU 1                   | 94.5 (78 – 135)        | 83.5 (69 – 215)            | 84.3 (53 – 129)                  |
| GLU 2                   | 88.5 (81 – 125)        | 88 (65 – 120)              | 87 (55 – 142)                    |
| CRP 1                   | <b>2.08 (1 – 7.3)</b>  | <b>4.04 (1 – 7.2)</b>      | <b>16.1 (6.22 – 34.7) *** ##</b> |
| CRP 2                   | <b>1.45 (1 – 2.46)</b> | <b>1.59 (0.5 – 13.9) ^</b> | <b>4.42 (1.2 – 15) * # ^^^</b>   |
| ALT 1                   | 26±13.3                | 18.8±5.96                  | 29.8±13.9                        |
| ALT 2                   | 20.3±6.92              | 19.6±4.74                  | 23.2±14.1                        |
| AST 1                   | 21.1±4.36              | 21.1±4.8                   | 31.3±20.6                        |
| AST 2                   | 20.1±5.91              | 20±4.55                    | 24.8±13.3                        |
| CHOL 1                  | 177±43.4               | 175±47.8                   | 161±28.9                         |
| CHOL 2                  | 159±35.6               | 171±53.4                   | 174±23.2                         |
| TG 1                    | 168±73.5               | 138±71.4                   | 116±40.9                         |
| TG 2                    | 135±54.3               | 124±71.1                   | 106±35.9                         |

\*\*\* - means the existence of statistically significant difference between PASI I vs PASI II / III

### - statistical differences between PASI II vs PASI III

^/^^/^^^ - means statistical differences in each parameter before and after treatment

**Table S3. Selected characteristic of the study subgroups depending on BMI.**

Parameters with "1" mean the value before treatment and with "2" – after treatment.

| Parameter               | BMI I ( <i>n</i> = 10) | BMI II ( <i>n</i> = 10) | BMI III ( <i>n</i> = 11) |
|-------------------------|------------------------|-------------------------|--------------------------|
| PASI 1                  | 15.1±6.53              | 17.3±7.83               | 18±7.55                  |
| PASI 2                  | 2.5 (1.8 – 15)         | 4.6 (1.8 – 8)           | 3.6 (0.7 – 8.1)          |
| Psoriasis history [yrs] | <b>7 (2 – 63)</b>      | <b>20.5 (5 – 30) *</b>  | <b>33 (1 – 58) *</b>     |
| Current time (months)   | 3 (1 – 24)             | 3 (1 – 24)              | 2 (1 – 20)               |
| Age [yrs]               | 48.4±19.7              | 54.7±20.5               | 56.7±6.12                |
| Body Weight [kg]        | <b>63.9±5.24</b>       | <b>81.4±9.99 ***</b>    | <b>105±17.1 *** ###</b>  |
| Height [cm]             | 171±10.2               | 173±10.9                | 171±9.75                 |
| BMI                     | <b>22.2±2.23</b>       | <b>27.2±1.87 ***</b>    | <b>36±3.74 *** ###</b>   |
| Cigarette smoking       | 5/5                    | 7/4                     | 3/9 #                    |
| HGB 1                   | 13.7±1.53              | 13.2±1.87               | 13.8±1.62                |
| HGB 2                   | 13.1±1.7               | 13.2±1.73               | 13.2±1.01                |
| RBC 1                   | 4.3±0.49               | 4.29±0.64               | 4.52±0.56                |
| RBC 2                   | 4.17±0.43              | 4.34±0.6                | 4.33±0.39                |
| WBC 1                   | 7.18±2.12              | 6.87±1.4                | 8.33±1.87                |
| WBC 2                   | 6.1±1.42               | 6.6±1.32                | 7.08±1.94                |
| PLT 1                   | 249±83.8               | 257±76.5                | 247±66.8                 |
| PLT 2                   | 222±75.9               | 246±47.8                | 225±56.5                 |
| GLU 1                   | 80 (53 – 215)          | 81 (69 – 97)            | <b>103 (53 – 135) *</b>  |
| GLU 2                   | 86 (55 – 112)          | 88.5 (78 – 95)          | 101 (67 – 140)           |
| CRP 1                   | 3.67 (1 – 16.1)        | 4.14 (1 – 28.1)         | 7.30 (1.48 – 34.7)       |
| CRP 2                   | <b>1.2 (0.5 – 2.4)</b> | 2.59 (1 – 13.6)         | <b>2.48 (1 – 6) ^^</b>   |
| ALT 1                   | 19.9±9.87              | 18.2±7.11               | <b>33.5±11.1 **</b>      |
| ALT 2                   | 17.1±4.07              | 16.1±6.19               | <b>28.3±11.2 **</b>      |
| AST 1                   | 20 (15 – 86)           | 18 (14 – 29)            | 25 (15 – 47)             |
| AST 2                   | 18.5 (14 – 39)         | 16 (13 – 27)            | 22 (13 – 52)             |
| CHOL 1                  | 158±47.5               | 171.2±31.4              | 182±38.9                 |
| CHOL 2                  | 156±43.5               | 186±38.9                | 167±32.6                 |
| TG 1                    | 110±76.8               | 131±45.7                | <b>167±55.2 *</b>        |
| TG 2                    | 101±64.7               | 126±56.8                | <b>131±38.6 ^</b>        |

\*\*\* - means the existence of statistically significant difference between BMI I vs BMI II / III

### - statistical differences? between BMI II vs BMI III

^/^^/^^^ - mean statistical differences in each parameter before and after treatment

**Table S4. Selected characteristic of the study subgroups depending on galectin level.**

Parameters with “1” mean the value before treatment and with “2” – after treatment.

| Parameter               | Galectin Low       | Galectin High        |
|-------------------------|--------------------|----------------------|
| PASI 1                  | 17.69±9.11         | 16.5±6.58            |
| PASI 2                  | 5.07±2.88          | 3.55±1.95            |
| Psoriasis history [yrs] | 23 (2 – 40)        | 10 (1.8 – 63)        |
| Age [yrs]               | 51.53±16.04        | 58.8±14.7            |
| Body Weight [kg]        | 88.37±18.99        | 82.87±23.69          |
| Height [cm]             | 174.5±7.24         | 169.6±12.45          |
| BMI                     | 29±5.69            | 28.89±7.47           |
| Cigarette smoking       | 8/7                | 7/8                  |
| HGB 1                   | 13.6±1.98          | 13.5±1.46            |
| HGB 2                   | 13.47±1.51         | 12.95±1.47           |
| RBC 1                   | 4.47±0.61          | 4.26±0.53            |
| RBC 2                   | 4.47±0.47          | 4.12±0.44            |
| WBC 1                   | 7.56±1.63          | 7.74±2.16            |
| WBC 2                   | 7.09±1.39          | 6.17±1.72            |
| PLT 1                   | 263.1±66.52        | 246.9±83.41          |
| PLT 2                   | 237.7±54.3         | 225.8±70.98          |
| GLU 1                   | 80 (69 – 135)      | 86 (53 - 215)        |
| GLU 2                   | 91 (78 – 125 )     | 86 (55 – 215)        |
| CRP 1                   | 4 (1 – 29.6)       | 7 (1 – 34.7)         |
| CRP 2                   | 1.87 (1 – 15)      | 1.94 (0.5 – 6)       |
| ALT 1                   | 24.13±12.4         | 25.6±11.93           |
| ALT 2                   | 19.53±10.12        | 22.53±9.05           |
| AST 1                   | 23 (14 - 34)       | 20 (17 – 86)         |
| AST 2                   | 17 (12 – 29)       | 19 (13 – 52)         |
| CHOL 1                  | 175.6±34.5         | 167.7±46.14          |
| CHOL 2                  | 183.4±36.11        | 157.4±39.12          |
| TG 1                    | <b>157.5±59.83</b> | <b>116.7±65.63 *</b> |
| TG 2                    | <b>135.8±48.26</b> | <b>104.3±32.12 *</b> |

\* - means the existence of statistically significant difference

**Table. S5. Characteristic of the study subgroups depending on the length of psoriasis history.**

Parameters with "1" mean the value before treatment and with "2" – after treatment.

| Parameter         | Short history: <20 yrs ( <i>n</i> = 15) | Long history: >20 yrs ( <i>n</i> = 16) |
|-------------------|-----------------------------------------|----------------------------------------|
| PASI I            | 16.07±6.55                              | 18.13±6.87                             |
| PASI II           | 2.6 (1.8 – 15)                          | 3.6 (0.7 – 8.4)                        |
| Years             | <b>6 (1 – 20)</b>                       | <b>33 (21 – 63) ***</b>                |
| Age [years]       | 52.07±18.73                             | 58.27±11.42                            |
| Body Weight [kg]  | 81.17±21.2                              | 90.07±20.51                            |
| Height [cm]       | 172.2±10.19                             | 171.9±10.78                            |
| BMI               | 27.39±6.62                              | 30.49±6.27                             |
| Cigarette smoking | 8/7                                     | 7/9                                    |
| HGB 1             | 13.74±2                                 | 13.36±1.41                             |
| HGB 2             | 13.38±1.94                              | 13.04±0.86                             |
| RBC 1             | 4.4±0.7                                 | 4.33±0.43                              |
| RBC 2             | 4.32±0.63                               | 4.26±0.29                              |
| WBC 1             | 7.68±1.77                               | 7.62±2.06                              |
| WBC 2             | 6.93±1.44                               | 6.87±1.77                              |
| PLT 1             | 274.8±55.15                             | 235.2±70.22                            |
| PLT 2             | 228.3±60.4                              | 235.1±45.51                            |
| GLU 1             | 83 (69 – 215)                           | 92 (53 – 135)                          |
| GLU 2             | 87 (78 – 140)                           | 91 (55 – 125)                          |
| CRP 1             | 5.14 (1 – 34.7)                         | 5.13 (1 – 29.6)                        |
| CRP 2             | 1.87 (0.5 – 15)                         | 2.37 (1 – 6)                           |
| ALT 1             | 22.93±11.11                             | 26.8±12.83                             |
| ALT 2             | 19.87±7.77                              | 22.2±10.22                             |
| AST 1             | 22.93±8.74                              | 26.47±12.95                            |
| AST 2             | 21.33±8.82                              | 22±8.67                                |
| CHOL 1            | 172.8±43.32                             | 170.5±38.38                            |
| CHOL 2            | 168.7±37.27                             | 172.1±38.98                            |
| TG 1              | 134.6±57.86                             | 139.7±54.61                            |
| TG 2              | 118.3±56.38                             | 121.8±37.21                            |

\*\*\*- means the existence of statistically significant difference ( $p < 0.001$ )

**Table S6. Selected correlations before and after treatment with reference to duration of psoriasis (a) and the galectin-3 concentration threshold (b)**

a)

|                        | Short Length <20 yrs ( <i>n</i> =15) |          | Long Length >20 yrs ( <i>n</i> = 16) |            |             |
|------------------------|--------------------------------------|----------|--------------------------------------|------------|-------------|
|                        | Disease Length                       | Glucose  | Disease Length                       | Chol Total | TG          |
| <b>Galectin Before</b> | -0.576/*                             | 0.619/** | 0.608/*                              | -0.618/**  | -0.725/**   |
| <b>Galectin After</b>  | -0.571/*                             | 0.195/NS | 0.46/0.062                           | -0.626/**  | -0.385/0.11 |

b)

|                        | Galectin Low   |                 |                 | Galectin High |          |           |
|------------------------|----------------|-----------------|-----------------|---------------|----------|-----------|
|                        | Body weight    | BMI             | Glucose         | Body weight   | BMI      | Glucose   |
| <b>Galectin Before</b> | <b>0.488/*</b> | <b>0.662/**</b> | <b>0.693/**</b> | -<br>0.067/NS | 0.041/NS | 0.082/NS  |
| <b>Galectin After</b>  | 0.130/NS       | 0.246/NS        | 0.124/NS        | 0.242/NS      | 0.211/NS | -0.109/NS |

\*/\*\*- means the existence of statistically significant difference between the parameters with  $p < 0.05$ ; <

0.01, respectively

NS- non-significant

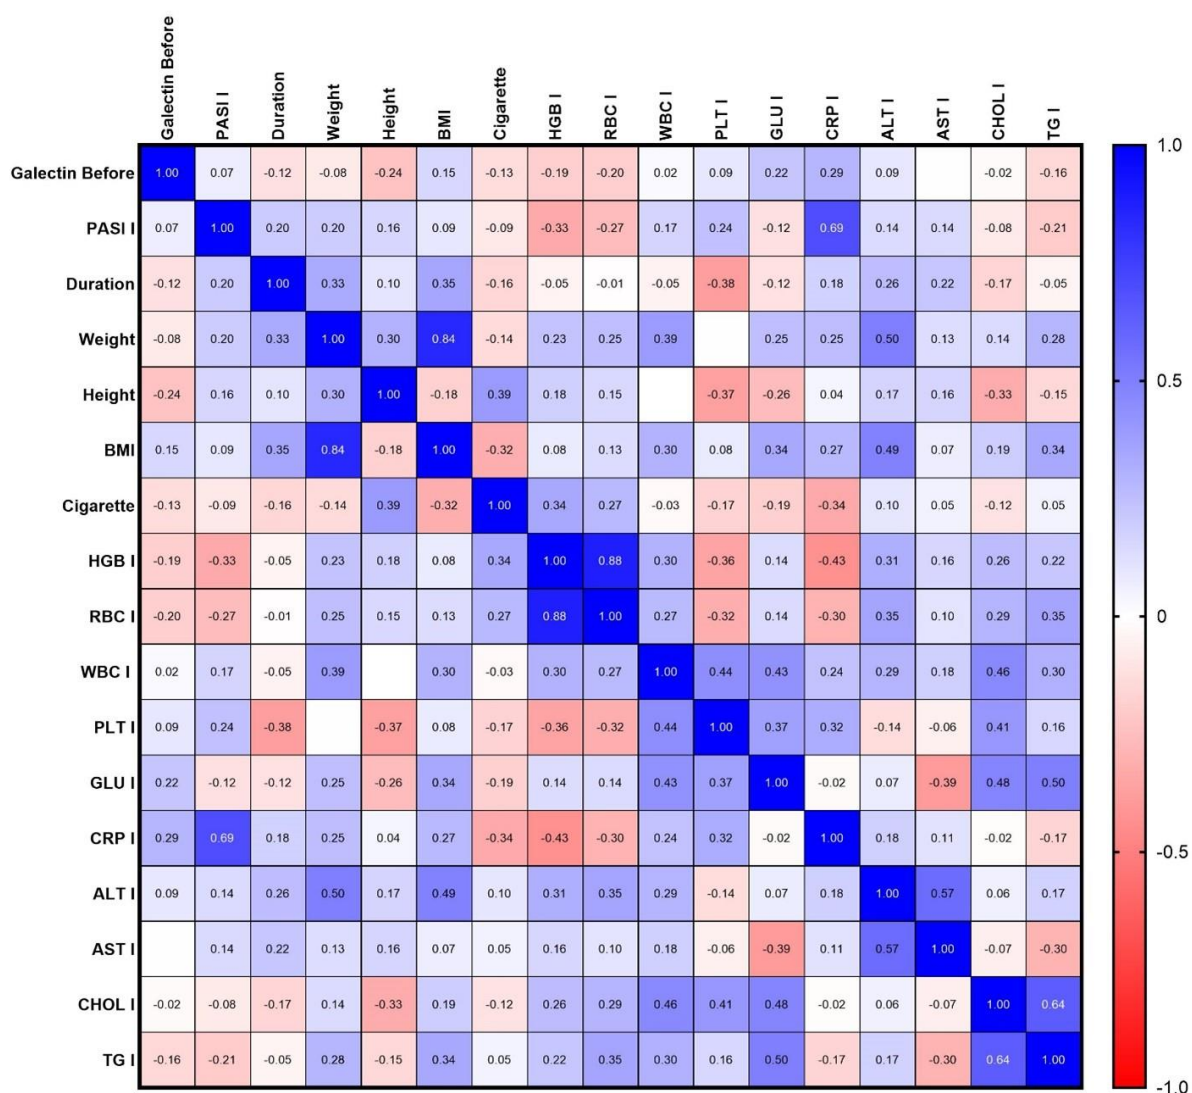

Figure S1. Correlations between gal-3 level and selected parameters before treatment with use of Spearman's rank correlation.

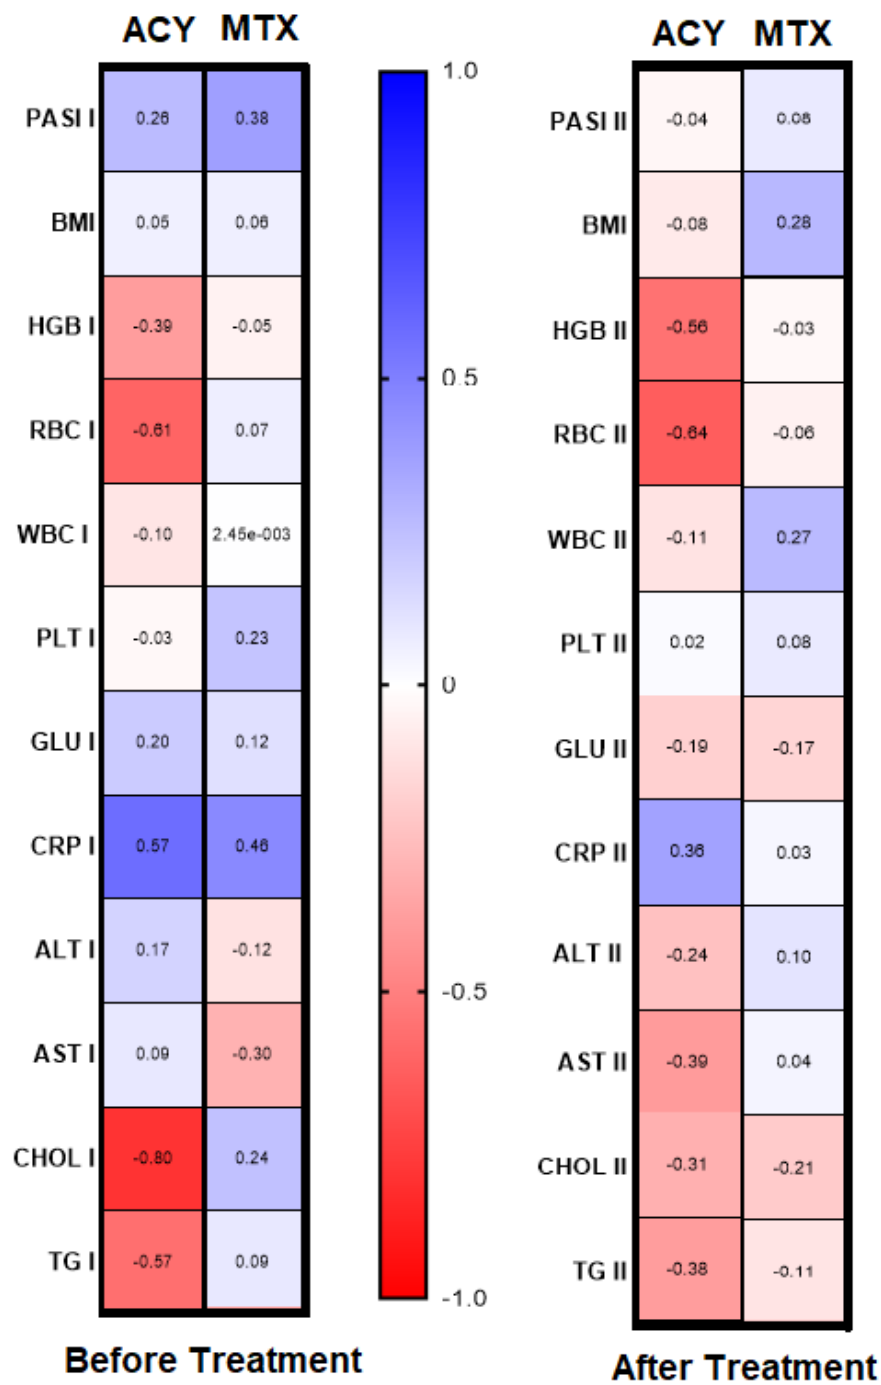

Figure S2. Correlations between selected parameters and serum galectin-3 level in patients before and after treatment with acitretin (ACY) and methotrexate (MTX) with use of Spearman's rank correlation.



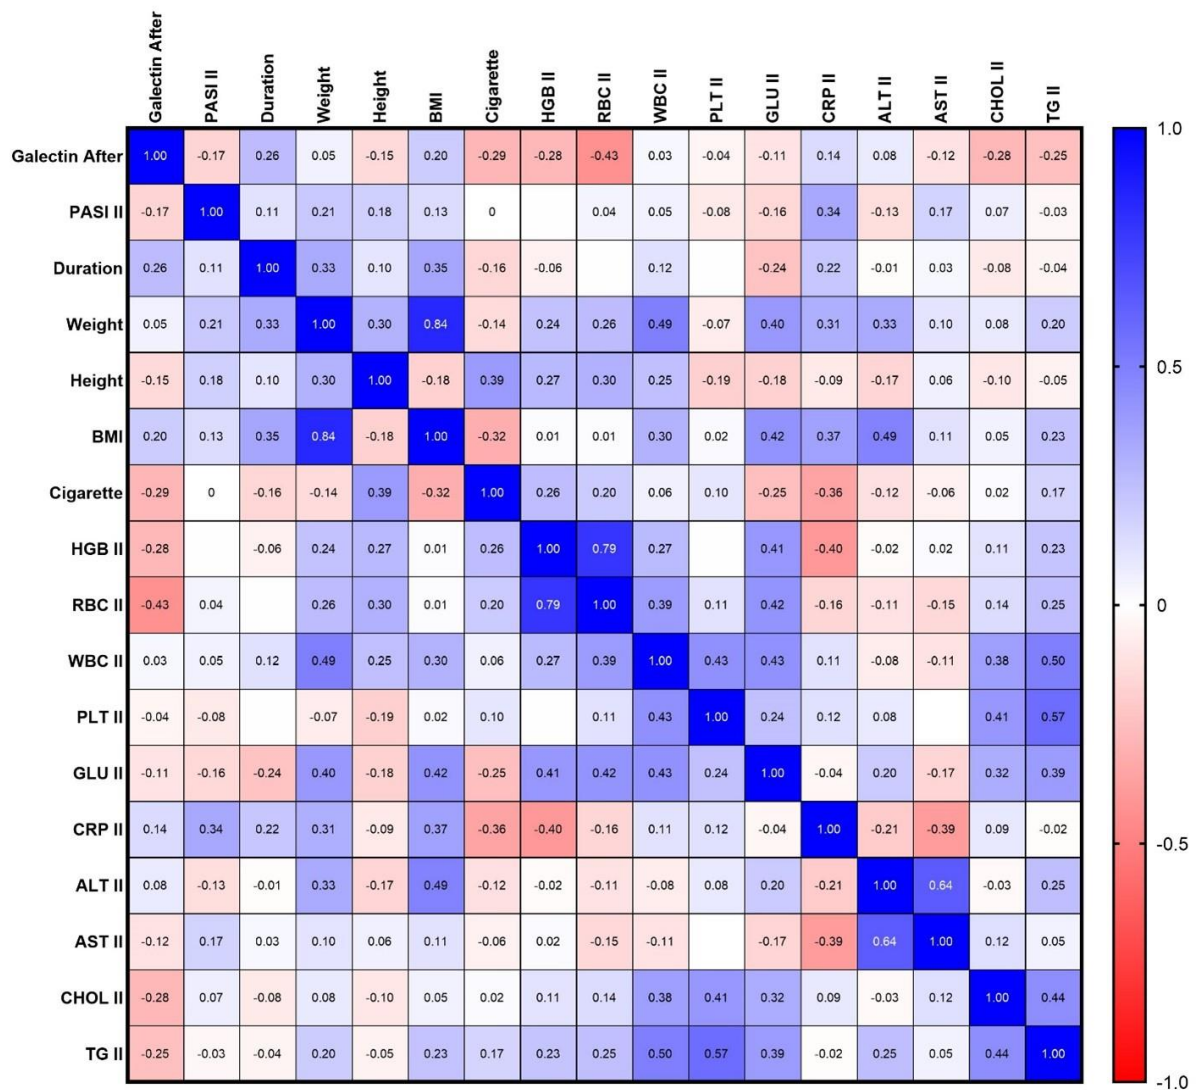

Figure S3. Correlations between gal-3 level and selected parameters after treatment with use of Spearman's rank correlation.

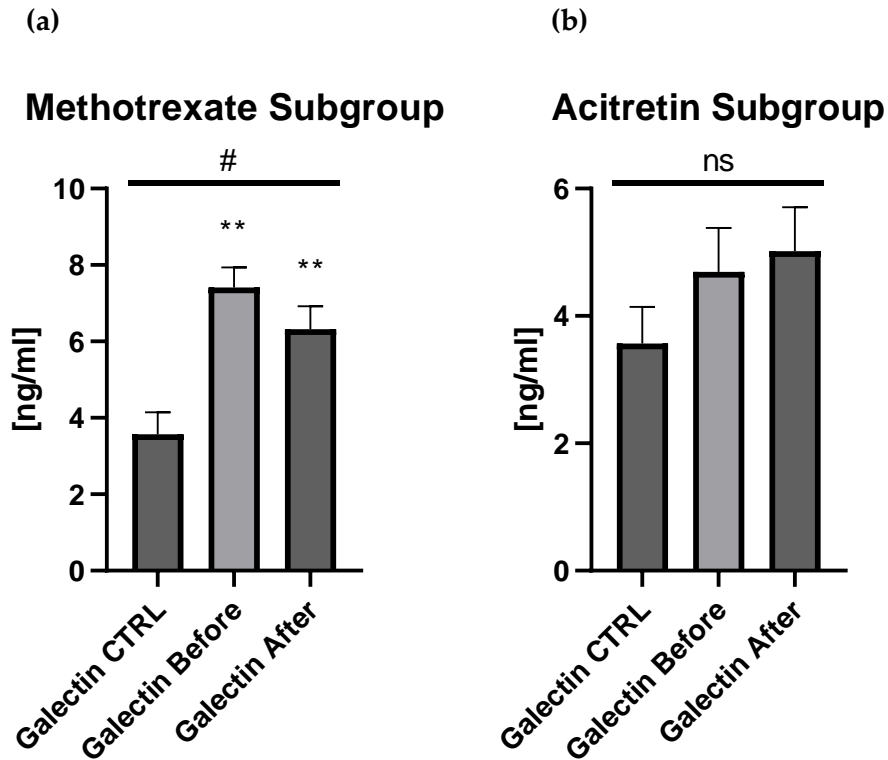

Figure S4. Gal-3 concentrations in controls and patients before and after the treatment with methotrexate (a) and acitretin (b). \*/\*\*/ - means the existence of statistically significant difference between patients single group compared to control group with  $p < 0.05$ ;  $< 0.01$ , respectively. # - shows the statistical significance between control group and marked patients' subgroups when compared using ANOVA with  $p < 0.05$ .

NS, non-significant
